# Supplementary material
Source: PubMed Central journal article supplement (PMC3571265)

## Supplemental Material

Complete gene expression data using Affymetrix 3PRIME IVT ID Chip™ (54,614 genes) and human immature dendritic cells stimulated with rBmAsnRS, IL-8 and control (media) has been deposited with the National Center for Biotechnology Information Gene Expression Omnibus (GEO, (<http://www.ncbi.nlm.nih.gov/geo/info/linking.html>)) with the accession number of GSE39999.

- **Figure S1.** Heat map showing differential gene expression in human immature dendritic cells stimulated with rBmAsnRS vs IL8 by using an NFkB specific mini-microarray.
- **Figure S2.** K.E.G.G.\* Pathway: NK cell mediated cytotoxicity signal transduction pathway with key rBmAsnRS- regulated genes indicated by red stars.
- **Figure S3.** K.E.G.G. Pathway: Toll-like receptor signal transduction pathway with key rBmAsnRS-regulated genes indicated by red stars.
- **Figure S4.** K.E.G.G. Pathway: Chemokine signal transduction pathway with key rBmAsnRS-regulated genes indicated by red stars.
- **Figure S5.** K.E.G.G. pathway: MAPK Signaling Pathway with key rBmAsnRS -regulated genes indicated by red stars.

\* Kyoto Encyclopedia of Genes and Genomes.

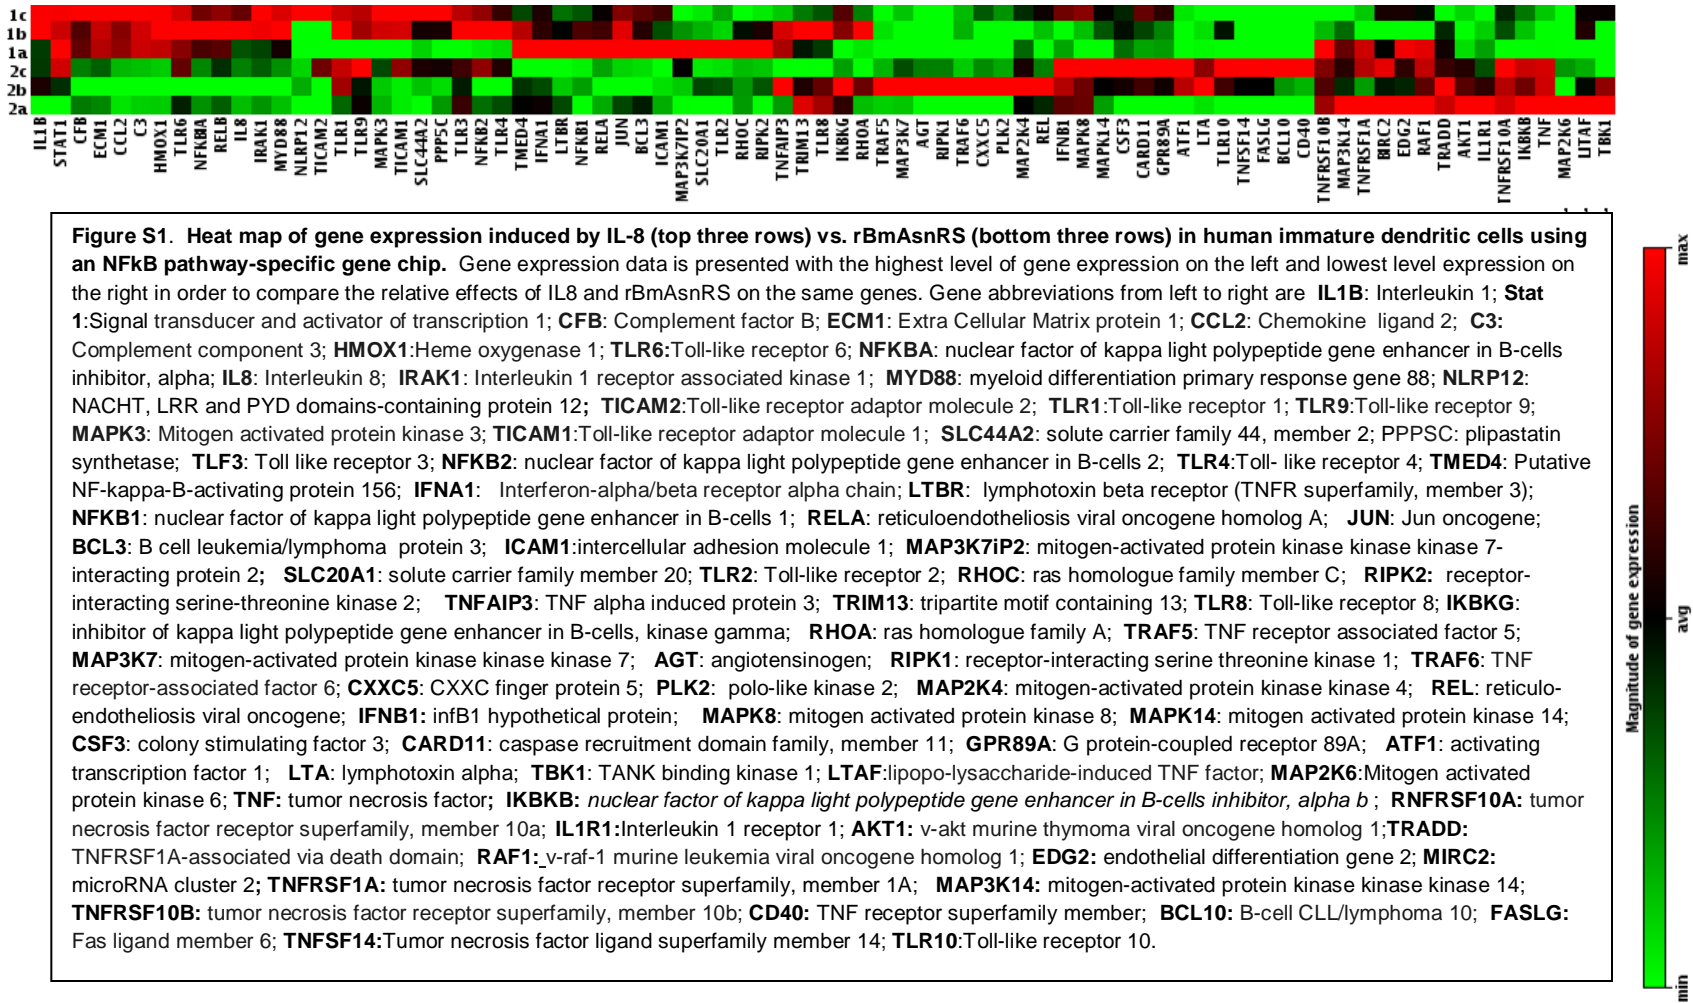



**FIGURE S3.** K.E.G.G. Pathway of Toll-like receptor mediated signal transduction stimulated by rBmAsnRS in human immature dendritic cells. Key rBmAsnRS-regulated genes are indicated by a red star.

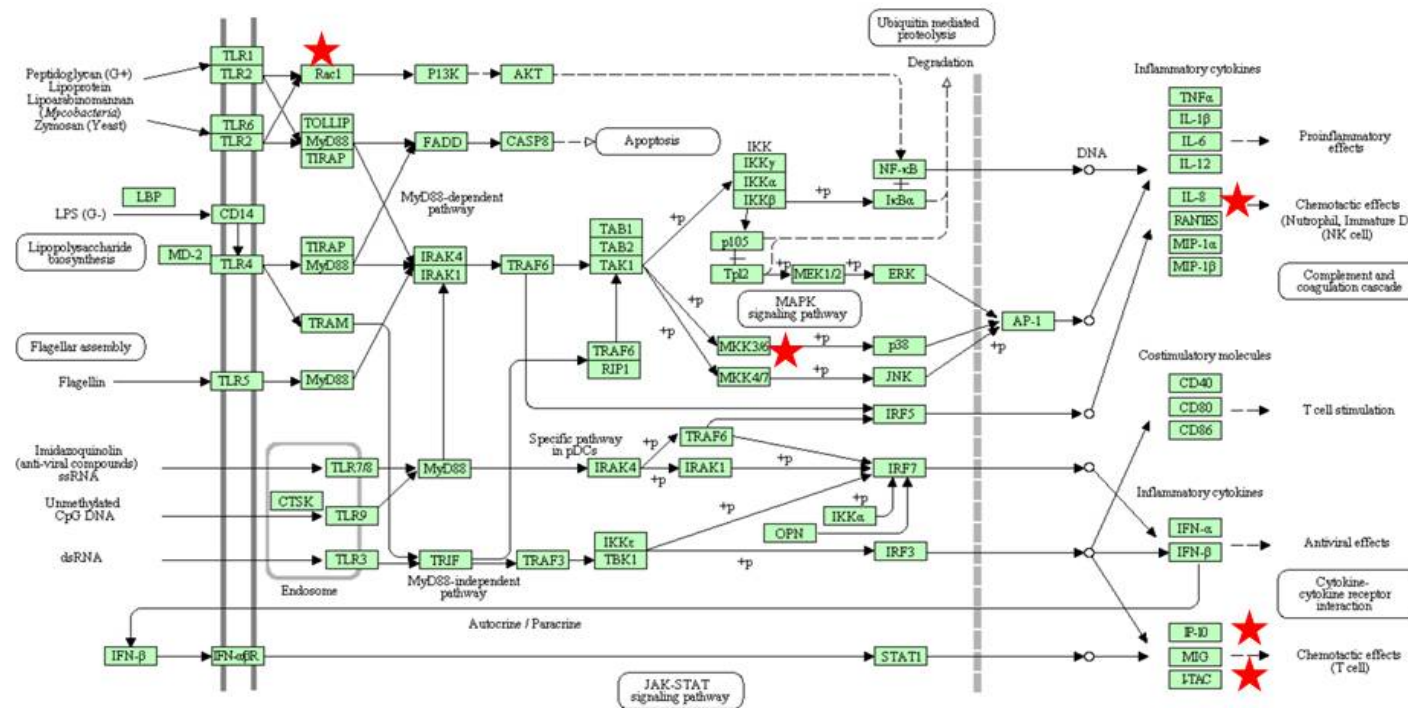

**FIGURE S4.** K.E.G.G. Pathway of Chemokine receptor signal transduction stimulated by rBmAsnRS in human immature dendritic cells. Key rBmAsnRS-regulated genes are indicated by a red star.

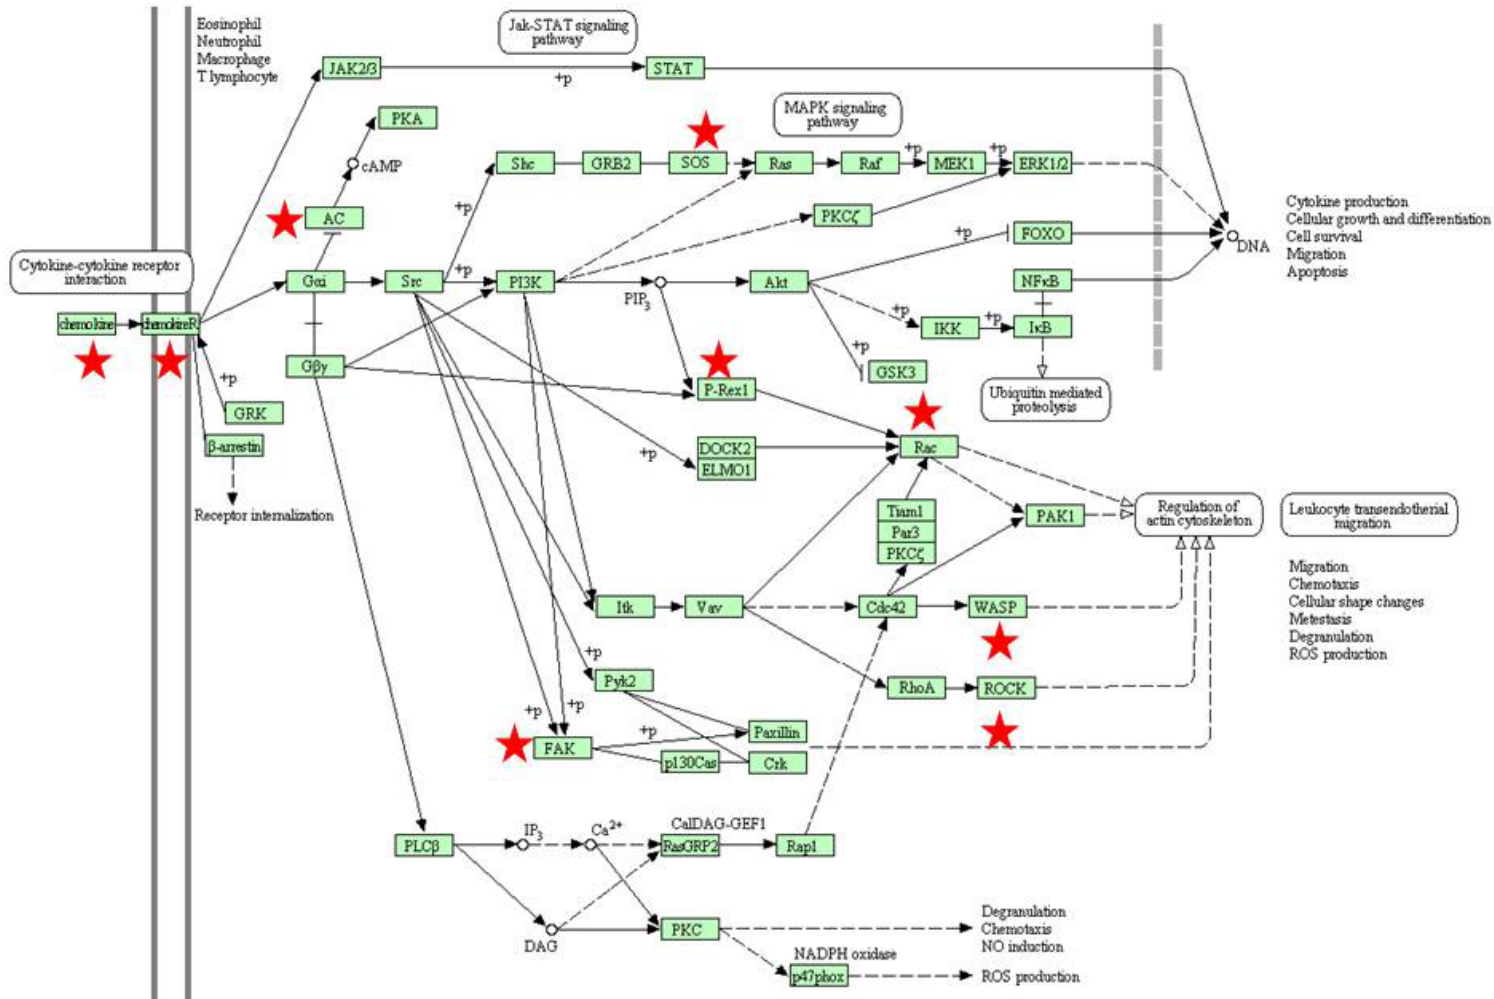

**Figure S5.** K.E.G.G. Pathway of MAPK signal transduction stimulated by rBmAsnRS in human immature dendritic cells. Key rBmAsnRS-regulated genes are indicated by a red star.

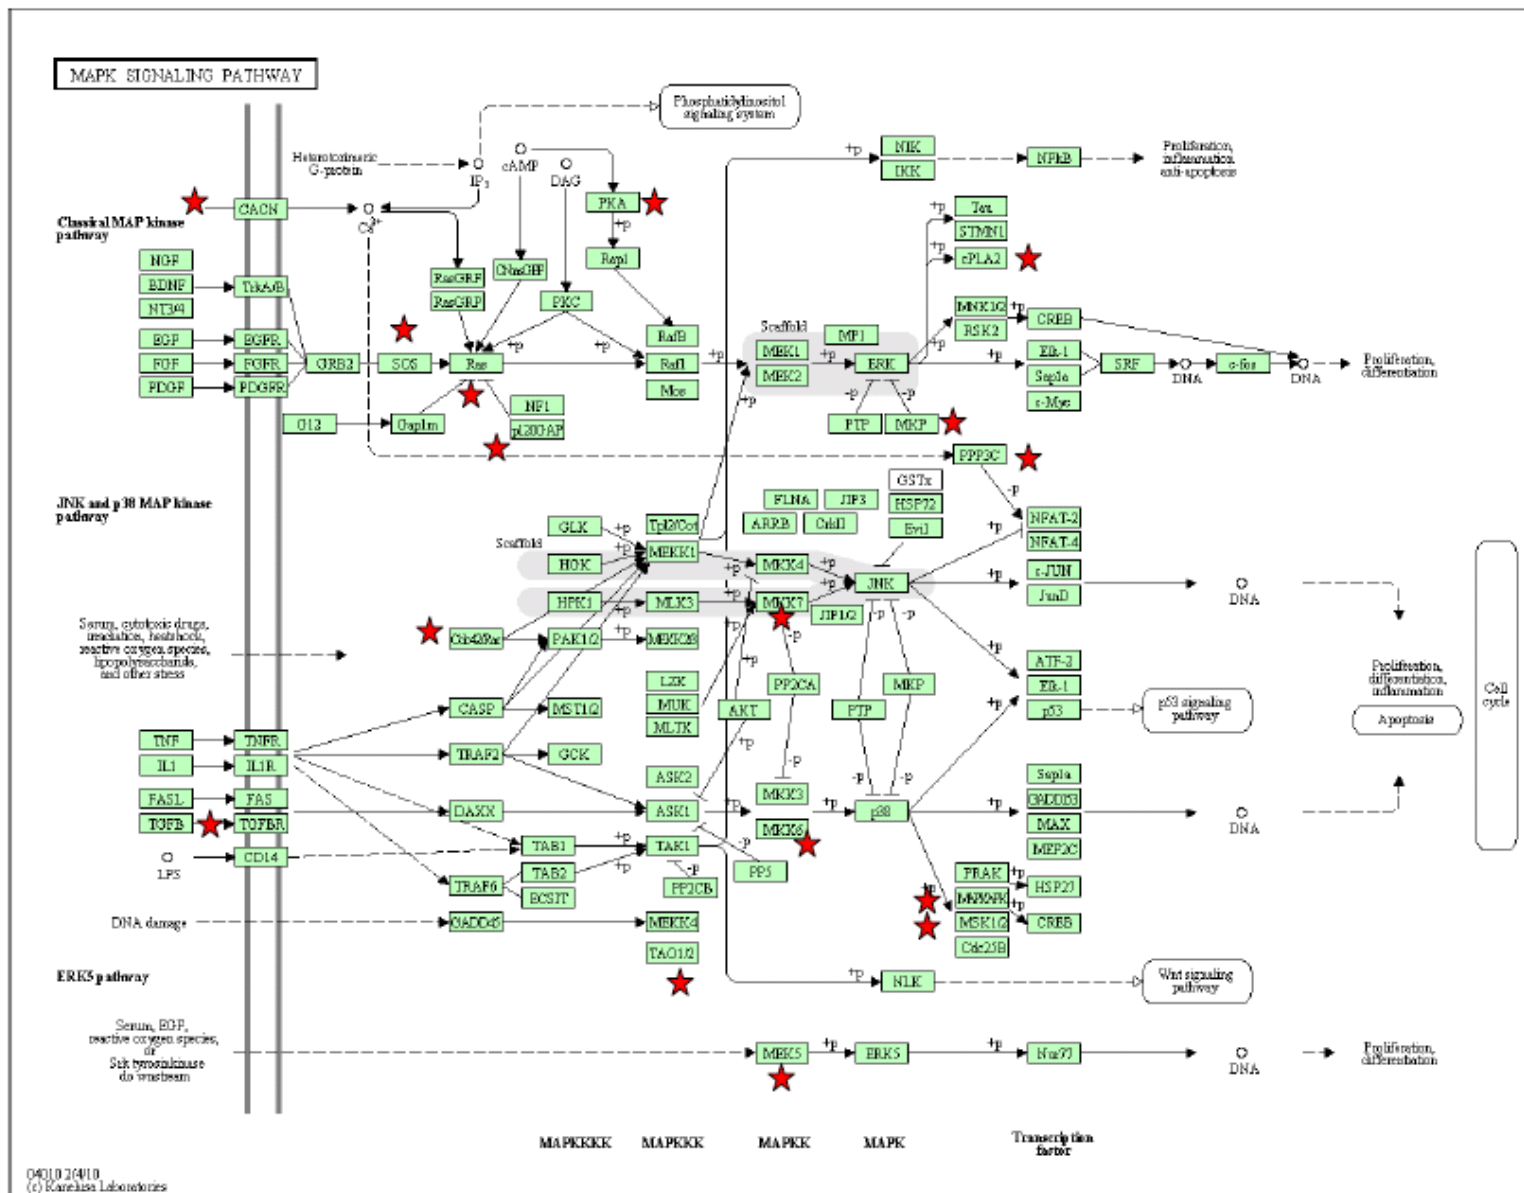

Supplement: CVI.00594-12_zcd999094665so1.pdf [file CVI.00594-12_zcd999094665so1.pdf]
